# Supplementary material for: Serum Metabolomic Signatures for Knee Cartilage Volume Loss over 10 Years in Community-Dwelling Older Adults
Source: MDPI journal article supplement (doi:10.3390/life12060869), 2022-06-10
Supplement: s1 [file s1]

**Supplementary Table S1:** List of metabolites measured by the TMIC Prime Metabolomics Profiling Assay

| Metabolite class                     | Number | Metabolite name or abbreviation                                                                                                                                                                                                                                                                                                                                         |
|--------------------------------------|--------|-------------------------------------------------------------------------------------------------------------------------------------------------------------------------------------------------------------------------------------------------------------------------------------------------------------------------------------------------------------------------|
| Carnitine                            | 1      | C0                                                                                                                                                                                                                                                                                                                                                                      |
| Acylcarnitines                       | 25     | C2, C3, C3:1, C4, C4:1, C5, C5:1, C6(or C4:1-DC), C6:1, C8, C9, C10, C10:1, C10:2, C12, C12:1, C14, C14:1, C14:2, C16, C16:1, C16:2, C18, C18:1, C18:2                                                                                                                                                                                                                  |
| Hydroxy- and dicarboxyacylcarnitines | 14     | C3-OH, C4-OH(or C3-DC), C5:1-DC, C5-DC(or C6-OH), C5-M-DC, C5-OH(or C3-DC-M), C7-DC, C12-DC, C14:1-OH, C14:2-OH, C16:1-OH, C16:2-OH, C16-OH, C18:1-OH                                                                                                                                                                                                                   |
| Amino acids and derivatives          | 25     | Alanine, arginine, asparagine, aspartate, citrulline, glutamine, glutamate, glycine, histidine, isoleucine, leucine, lysine, methionine, ornithine, phenylalanine, proline, serine, threonine, tryptophan, tyrosine, valine, betaine, creatine, phosphocreatine, methylhistidine                                                                                        |
| Amine oxides                         | 1      | Trimethylamine N-oxide (TMAO)                                                                                                                                                                                                                                                                                                                                           |
| Biogenic amines                      | 23     | Acetylnornithine, asymmetric dimethylarginine, total dimethylarginine, alpha-aminoadipic acid, carnosine, creatinine, dopa, dopamine, histamine, kynurenine, methionine sulfoxide, hydroxyproline (t4-OH-Pro), hydroxyproline (c4-OH-Pro), phenylethylamine, putrescine, sarcosine, serotonin, spermidine, spermine, diacetylspermine, taurine, tyramine, nitrotyrosine |
| Carboxylic acids                     | 1      | Homocysteine                                                                                                                                                                                                                                                                                                                                                            |
| Monosaccharides                      | 1      | Glucose                                                                                                                                                                                                                                                                                                                                                                 |
| Organic acids                        | 17     | Lactic acid, beta-hydroxybutyric acid, alpha-ketoglutaric acid, citric acid, butyric acid, propionic acid, 3-(3-hydroxyphenyl)-3-hydroxypropionic acid (HPPHA), para-hydroxyhippuric acid, succinic acid, fumaric acid, pyruvic acid, isobutyric acid, hippuric acid, methylmalonic acid, homovanillic acid, indole acetic acid, uric acid                              |
| Lyso-phosphatidylcholines            | 14     | LysoPC a C14:0/C16:0/C16:1/C17:0/C18:0/C18:1/C18:2/C20:3/C20:4/C24:0/C26:0/C26:1/C28:0/C28:1                                                                                                                                                                                                                                                                            |
| Diacyl-phosphatidylcholines          | 8      | PC aa C32:2/C36:0/C36:6/C38:0/C38:6/C40:1/C40:2/C40:6                                                                                                                                                                                                                                                                                                                   |
| Acyl-alkyl-phosphatidylcholines      | 2      | PC ae C36:0/C40:6                                                                                                                                                                                                                                                                                                                                                       |
| Sphingomyelins                       | 5      | SM C16:0, SM C16:1, SM C18:0, SM C18:1, SM C20:2                                                                                                                                                                                                                                                                                                                        |
| Hydroxysphingomyelins                | 5      | SM (OH) C14:1, SM (OH) C16:1, SM (OH) C22:1, SM (OH) C22:2, SM (OH) C24:1                                                                                                                                                                                                                                                                                               |
| Vitamins and cofactors               | 1      | Choline                                                                                                                                                                                                                                                                                                                                                                 |
| Total                                | 143    |                                                                                                                                                                                                                                                                                                                                                                         |

aa: acyl-acyl; ae: acyl-alkyl; a: acyl; Cx:y: where x is the number of carbons in the fatty acid side chain; y is the number of double bonds in the fatty acid side chain; DC: decarboxyl; M: methyl; OH: hydroxyl; PC: phosphatidylcholine; SM: sphingomyelin.
